# Supplementary material
Source: bioRxiv or medRxiv preprint supplement (https://www.biorxiv.org/highwire/filestream/80303/field_highwire_adjunct_files/0/192500-1.pdf)
Supplement: Supplementary file [file 192500-1.pdf]

## Supporting Information

### Molecular basis for the maintenance of lipid asymmetry in the outer membrane of *Escherichia coli*

Jiang Yeow<sup>a,b,1</sup>, Kang Wei Tan<sup>a,1</sup>, Daniel A. Holdbrook<sup>c,1</sup>, Zhi-Soon Chong<sup>a</sup>, Jan K. Marzinek<sup>c,d</sup>, Peter J. Bond<sup>c,d,\*</sup>, Shu-Sin Chng<sup>a,e,\*</sup>

<sup>a</sup>Department of Chemistry, National University of Singapore, Singapore 117543, <sup>b</sup>National University of Singapore Graduate School for Integrative Sciences and Engineering (NGS), Singapore 117456, <sup>c</sup>Bioinformatics Institute, Agency for Science, Technology, and Research (A\*STAR), Singapore 138671, <sup>d</sup>Department of Biological Sciences, National University of Singapore, Singapore 117543, <sup>e</sup>Singapore Center for Environmental Life Sciences Engineering, National University of Singapore (SCELSE-NUS), Singapore 117456.

<sup>1</sup>These authors contributed equally to this work.

\*To whom correspondence should be addressed: Shu-Sin Chng, Department of Chemistry, National University of Singapore, Singapore 117543, E-mail: [chmchngs@nus.edu.sg](mailto:chmchngs@nus.edu.sg). Peter J. Bond, Bioinformatics Institute, Agency for Science, Technology, and Research (A\*STAR), Singapore 138671, [Email: peterjb@bii.a-star.edu.sg](mailto:peterjb@bii.a-star.edu.sg)

## Supplementary references

1. Ovchinnikov S, Park H, Varghese N, Huang PS, Pavlopoulos GA, Kim DE, et al. Protein structure determination using metagenome sequence data. *Science*. 2017;355(6322):294-8.
2. Kyte J, Doolittle RF. A simple method for displaying the hydropathic character of a protein. *J Mol Biol*. 1982;157(1):105-32.
3. Casadaban MJ. Transposition and fusion of the lac genes to selected promoters in *Escherichia coli* using bacteriophage lambda and Mu. *J Mol Biol*. 1976;104(3):541-55.
4. Chong ZS, Woo WF, Chng SS. Osmoporin OmpC forms a complex with MlaA to maintain outer membrane lipid asymmetry in *Escherichia coli*. *Mol Microbiol*. 2015;98(6):1133-46.
5. Ruiz N, Chng SS, Hiniker A, Kahne D, Silhavy TJ. Nonconsecutive disulfide bond formation in an essential integral outer membrane protein. *Proc Natl Acad Sci U S A*. 2010;107(27):12245-50.
6. Wu T, McCandlish AC, Gronenberg LS, Chng SS, Silhavy TJ, Kahne D. Identification of a protein complex that assembles lipopolysaccharide in the outer membrane of *Escherichia coli*. *Proc Natl Acad Sci U S A*. 2006;103(31):11754-9.
7. Khetrapal V, Mehershahi K, Rafee S, Chen S, Lim CL, Chen SL. A set of powerful negative selection systems for unmodified *Enterobacteriaceae*. *Nucleic Acids Res*. 2015;43(13):e83.
8. Ryu Y, Schultz PG. Efficient incorporation of unnatural amino acids into proteins in *Escherichia coli*. *Nat Methods*. 2006;3(4):263-5.
9. Murphy KC, Campellone KG. Lambda Red-mediated recombinogenic engineering of enterohemorrhagic and enteropathogenic *E. coli*. *BMC Mol Biol*. 2003;4:11.

10. Chang AC, Cohen SN. Construction and characterization of amplifiable multicopy DNA cloning vehicles derived from the P15A cryptic miniplasmid. *J Bacteriol.* 1978;134(3):1141-56.
11. Weiss DS, Chen JC, Ghigo JM, Boyd D, Beckwith J. Localization of FtsI (PBP3) to the septal ring requires its membrane anchor, the Z ring, FtsA, FtsQ, and FtsL. *J Bacteriol.* 1999;181(2):508-20.

## Supplementary Figures

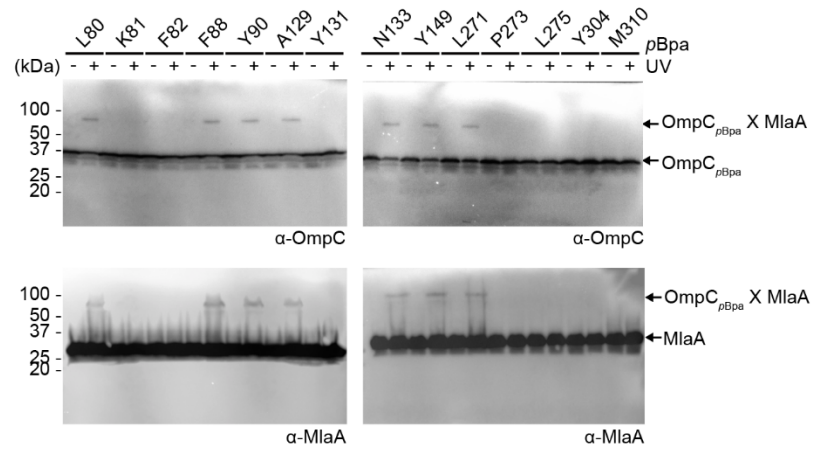

**Figure S1.** Seven more positions at the dimeric interface of the OmpC trimer contact MlaA. Immunoblots showing UV-dependent formation of crosslinks between OmpC and MlaA in  $\Delta ompC$  cells expressing OmpC substituted with *pBpa* at indicated positions, selected as part of the localized search.

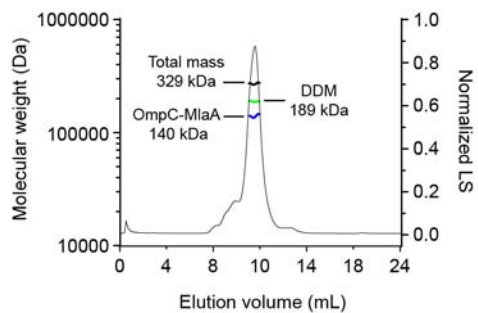

**Figure S2.** SEC-MALS analysis of the OmpC-MlaA complex revealing that one copy of MlaA binds to the OmpC trimer. As indicated, total molecular mass: 329 ( $\pm 0.4\%$ ) kDa; protein molecular mass: 140 ( $\pm 0.4\%$ ) kDa (observed), 148 kDa (predicted, OmpC<sub>3</sub>MlaA); modifier (DDM) molecular mass: 189 ( $\pm 0.8\%$ ) kDa. Numbers stated after  $\pm$  show statistical consistency of analysis.

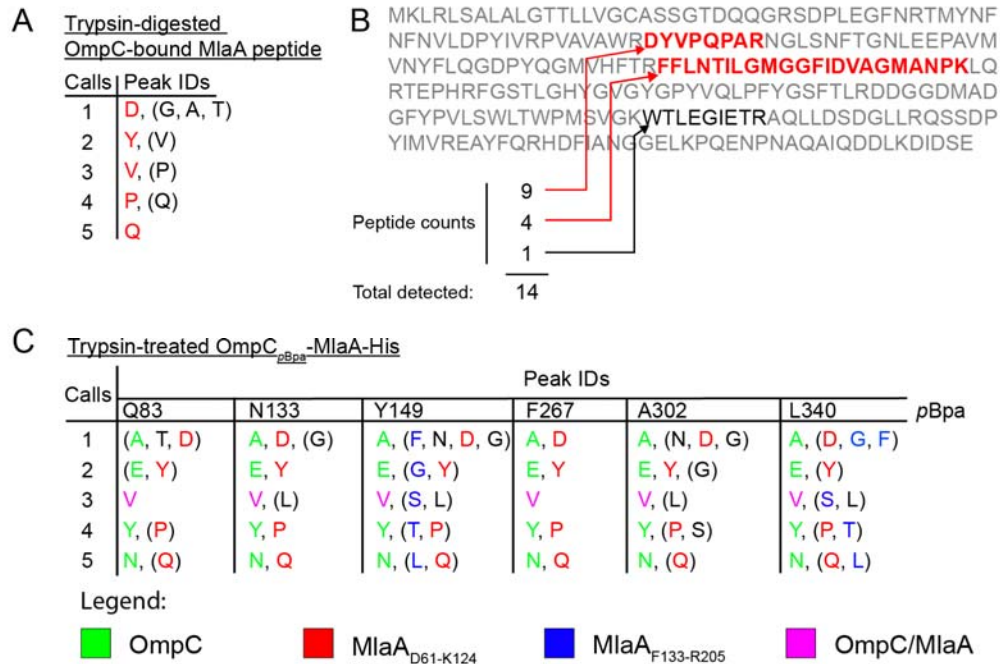

**Figure S3.** N-terminal sequencing and MS/MS analyses identified two specific MlaA peptides binding to OmpC. (A) First five residue calls for the MlaA peptide remaining bound to OmpC after trypsin digestion (see Fig. 2A) revealed that it starts with D<sup>61</sup>YVPQ of full-length MlaA protein. (B) MS/MS analysis of the MlaA peptide remaining bound to OmpC after trypsin digestion detected two MlaA fragments with high peptide counts (sequences colored red), suggesting that the OmpC-bound peptide has boundaries from D61 to K124. (C) First five residue calls for protein bands containing MlaA peptides crosslinked to OmpC<sub>pBpa</sub> (see Fig. 2B) revealed the presence of MlaA peptides starting with D<sup>61</sup>YVPQ and F<sup>133</sup>GSTL, along with OmpC N-terminus A<sup>21</sup>EVYN. Residue calls are assigned to the respective protein/peptide as denoted by the legend.

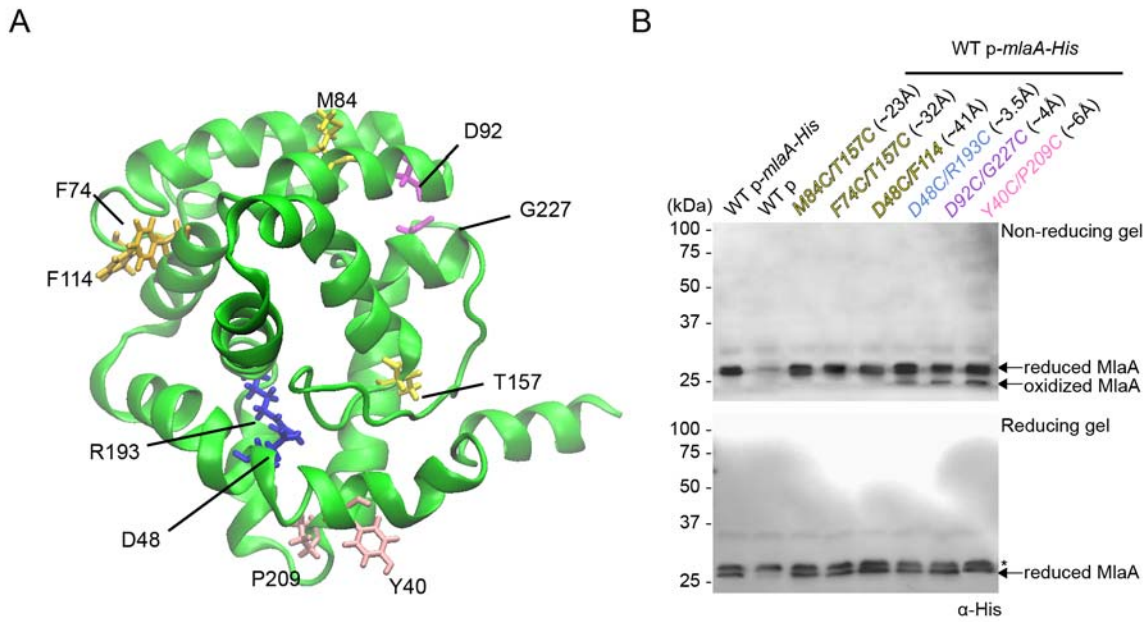

**Figure S4.** Residue pairs on MlaA predicted to contact each other based on coevolution analysis allow the formation of disulfide bonds when substituted with cysteines. (A) Cartoon representation of the MlaA structural model predicted based on residue-residue contacts inferred from co-evolution analysis of metagenomic sequence data prediction (GREMLIN, (1)), with strongly co-evolved residue pairs that are mutated to cysteines highlighted (same colored sticks). (B) Immunoblots showing oxidized or reduced forms of indicated MlaA-His double cysteine variants expressed in wild-type cells from the pET23/42 vector (p). Samples were subjected to non-reducing (*top*) or reducing (*bottom*) SDS-PAGE prior to transfer. A protein that cross-reacted with the  $\alpha$ -His antibody is denoted with (\*). Distances between cysteine pairs in unit angstrom ( $\text{\AA}$ ), as measured in the model in (A), are indicated in parentheses.

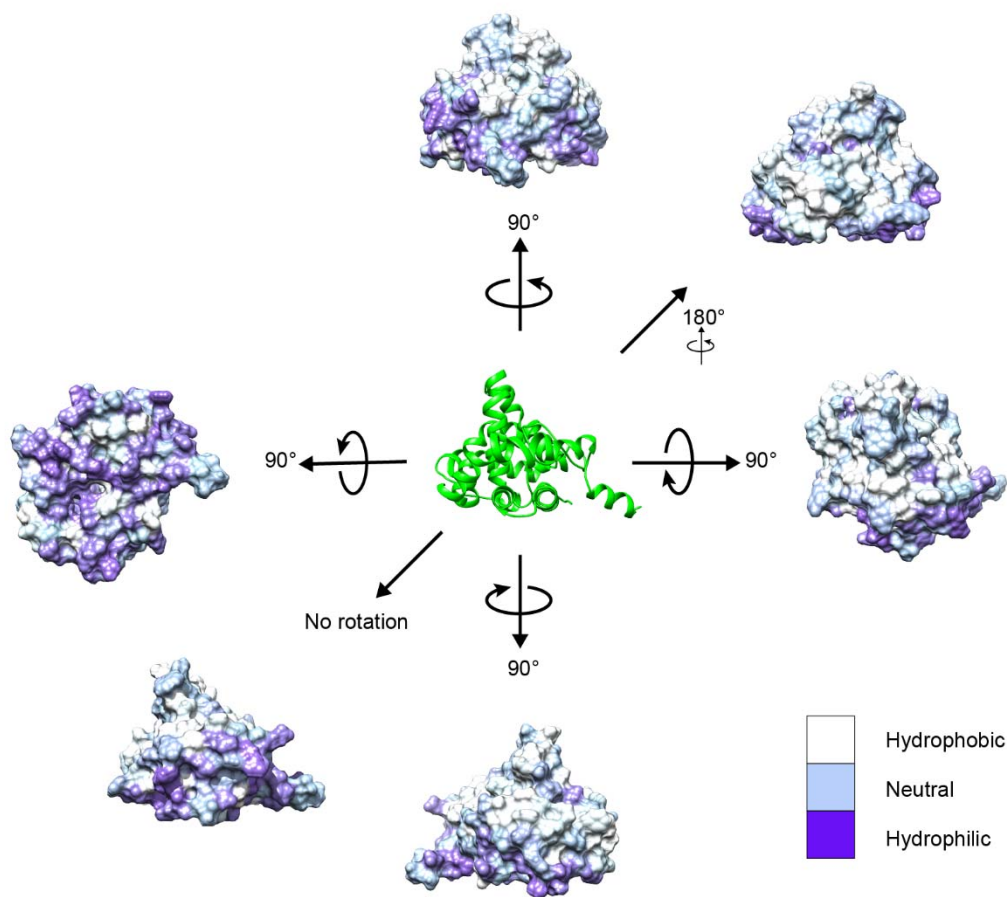

**Figure S5.** The surface of MlaA is mostly hydrophobic. Surface representation of the MlaA model (1) depicted in multiple orientations and colored based on amino acid hydrophobicity. Purple, light blue and white represent most hydrophilic to most hydrophobic amino acids based on the Kyte-Doolittle scale (2).



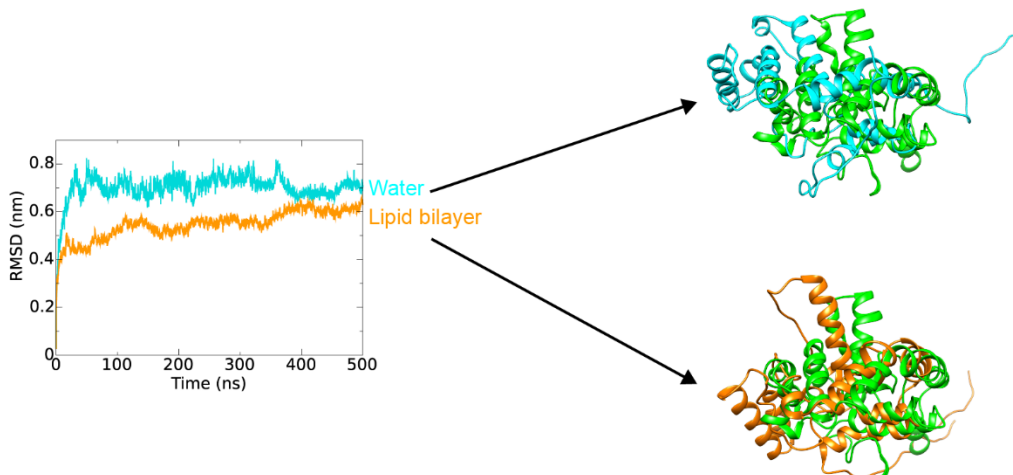

**Figure S6.** The MlaA structure modelled from co-evolution analysis (1) is more stable in the lipid bilayer. Averaged root-mean-square-deviation (RMSD) plots illustrating the changes of the backbone of MlaA models over the course of all-atomistic MD simulations, when placed in water (*cyan*) or in a lipid bilayer (*orange*). Superimpositions of the initial (*green*) and final structures for each simulation are shown on the right.

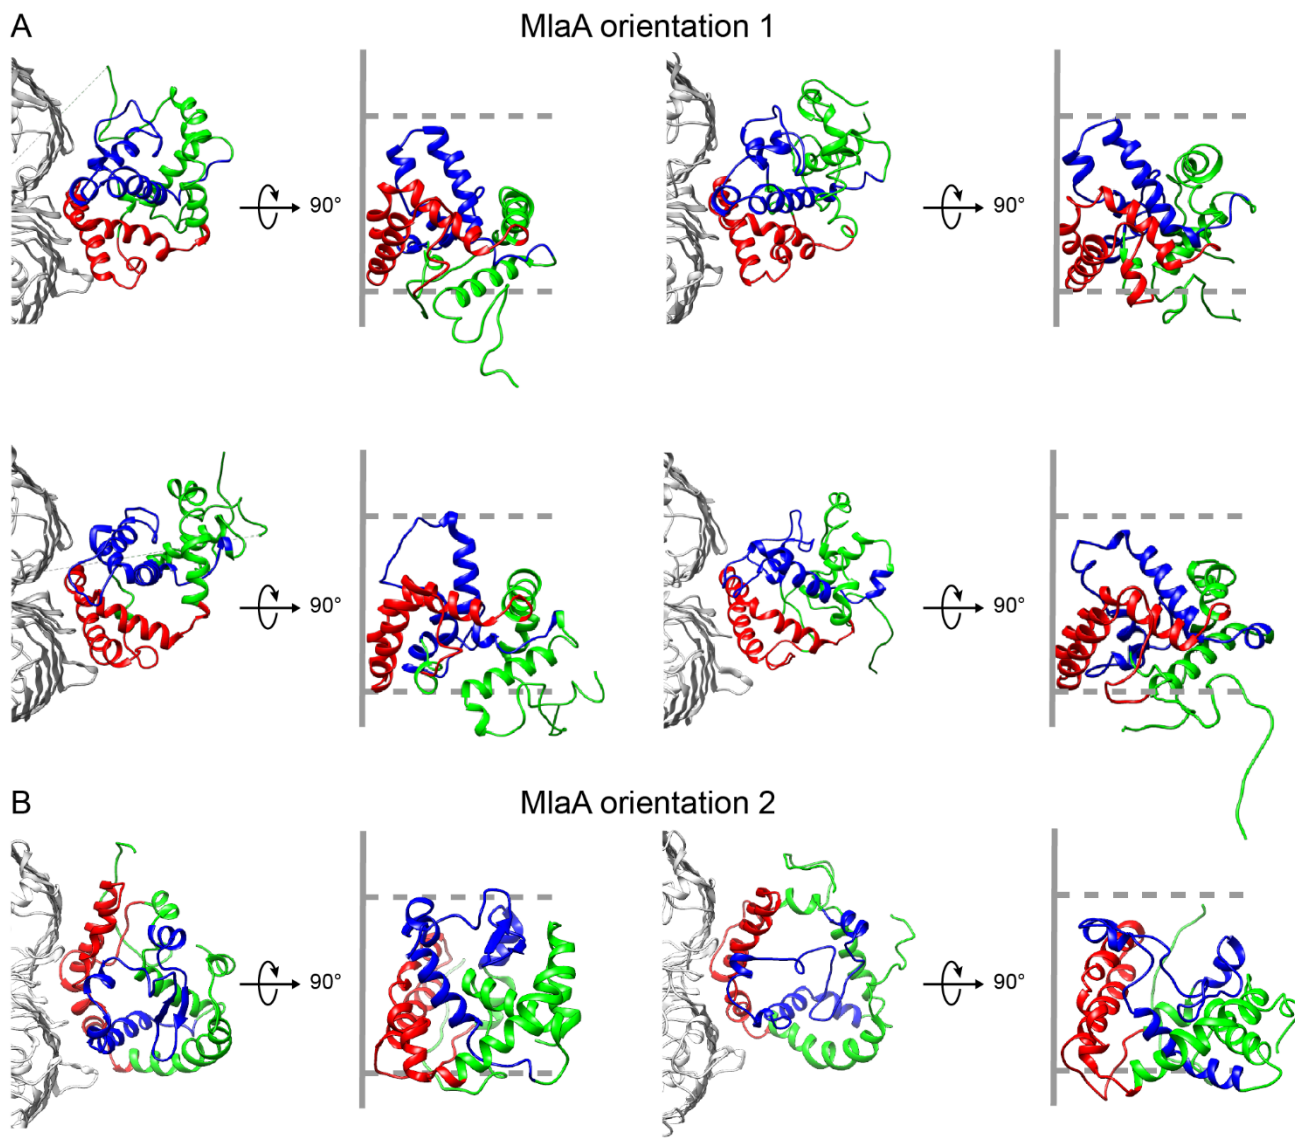

**Figure S7.** Six major clusters of all-atomistic MD simulated OmpC-MlaA structure depict how MlaA interacts with OmpC in two possible orientations in the OM bilayer. The bottom right model in (A) and (B) are reproduced as representative models in Figs. 3A and 3B. MlaA<sub>D61-K124</sub> and MlaA<sub>F133-R205</sub> peptides are highlighted in *red* and *blue*, respectively, as in Fig. 2D. The OM boundaries are indicated as *gray* dashed lines.

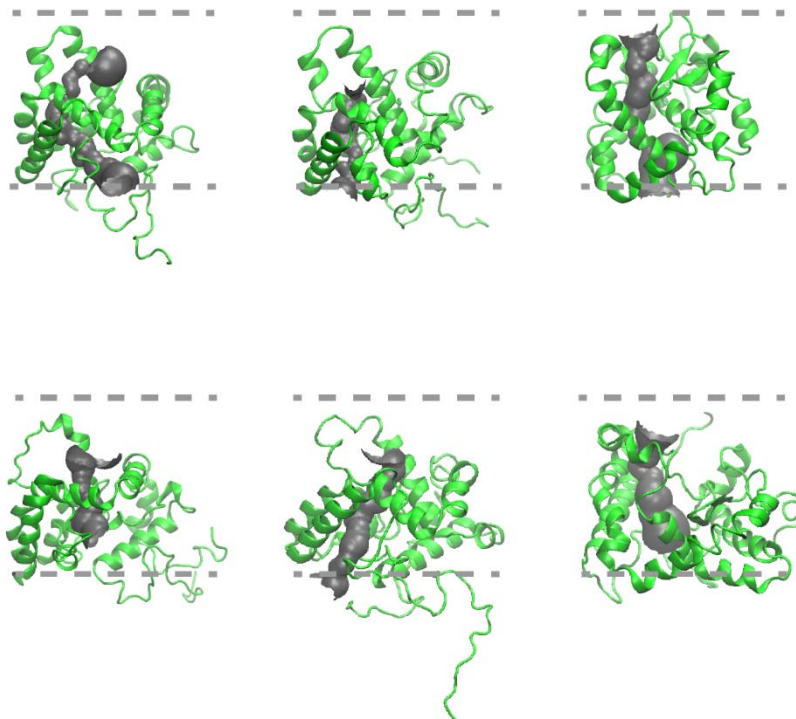

**Figure S8.** All six major clusters of MlaA structure from all-atomistic MD simulations of the OmpC-MlaA complex with putative hydrophilic channels depicted in *gray*. The bottom right model is reproduced in Fig. 4A. The OM boundaries are indicated as *gray* dashed lines.

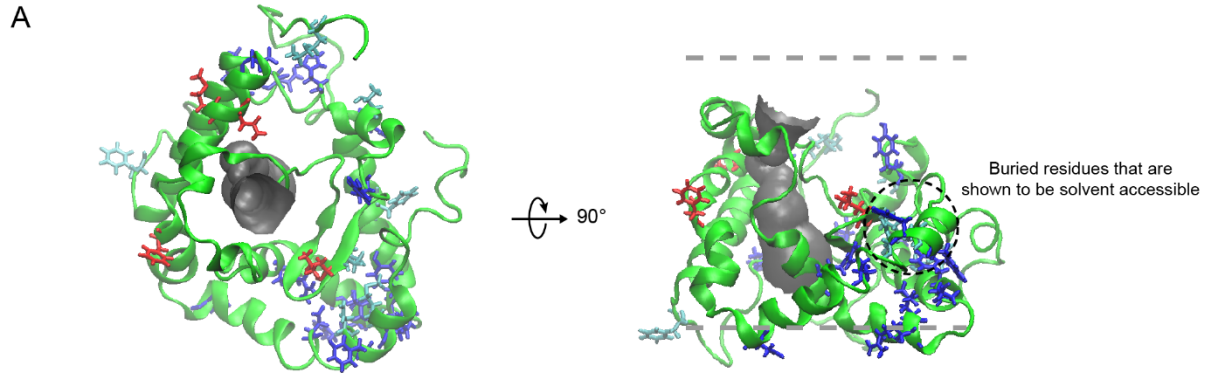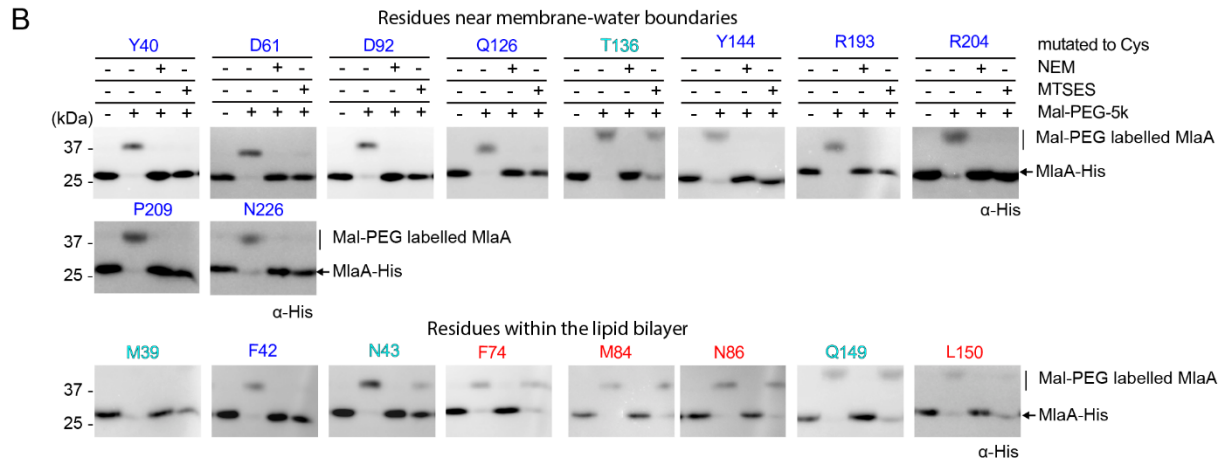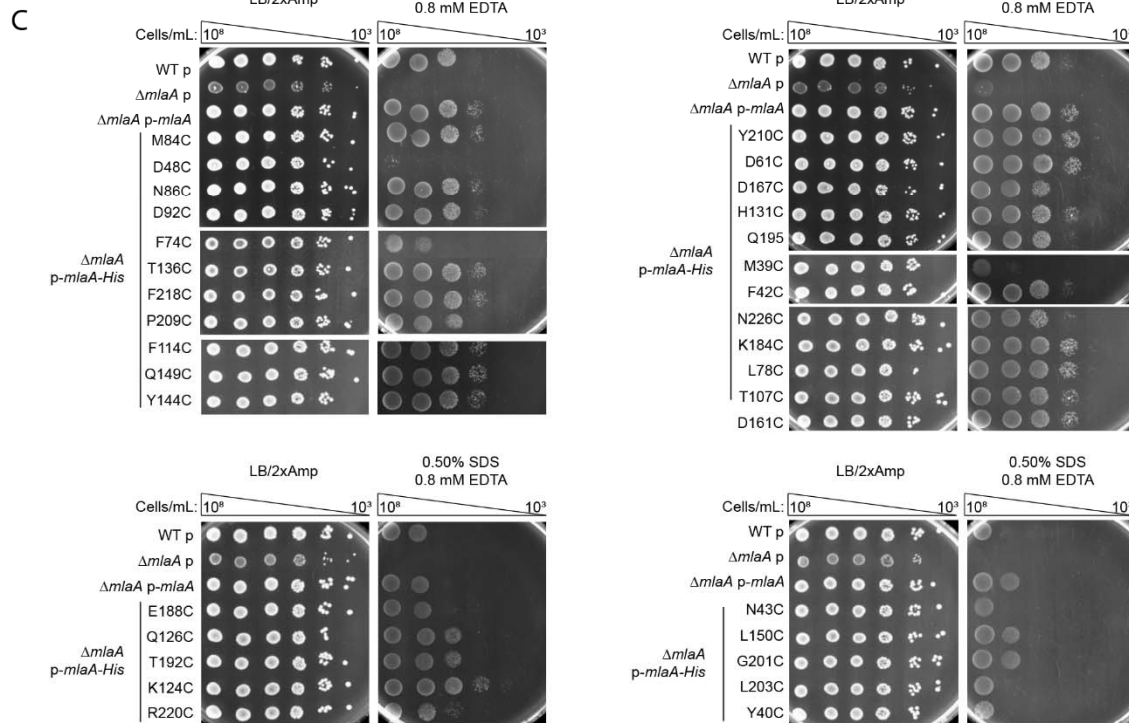

**Figure S9.** Substituted cysteine accessibility for residues in MlaA largely agrees with their predicted locations (near/at membrane-water boundaries or buried within the lipid bilayer). (A) A representative structure of MlaA from all-atomistic MD simulations with its putative channel depicted in *gray*. Non-channel residues that are fully, partially, or not solvent accessible, based on SCAM in (B), are highlighted in *blue*, *cyan*, and *red*, respectively. (B) Immunoblots showing maleimide-polyethylene glycol (Mal-PEG) alkylation of MlaA variants containing channel-facing residues substituted with cysteine (as depicted in (A)) following labelling by membrane permeable *N*-ethylmaleimide (NEM) or impermeable (MTSES) reagents. Mal-PEG alkylated MlaA<sub>Cys</sub>-His variants show a ~5 kDa mass shift. Positions fully, partially, or not blocked by MTSES, which reflects the level of solvent accessibility, are highlighted in *blue*, *cyan*, or *red*, respectively. (C) Analysis of SDS/EDTA sensitivity of wild-type (WT) and  $\Delta mlaA$  strains producing indicated MlaA cysteine variants from the pET23/42 vector (p).

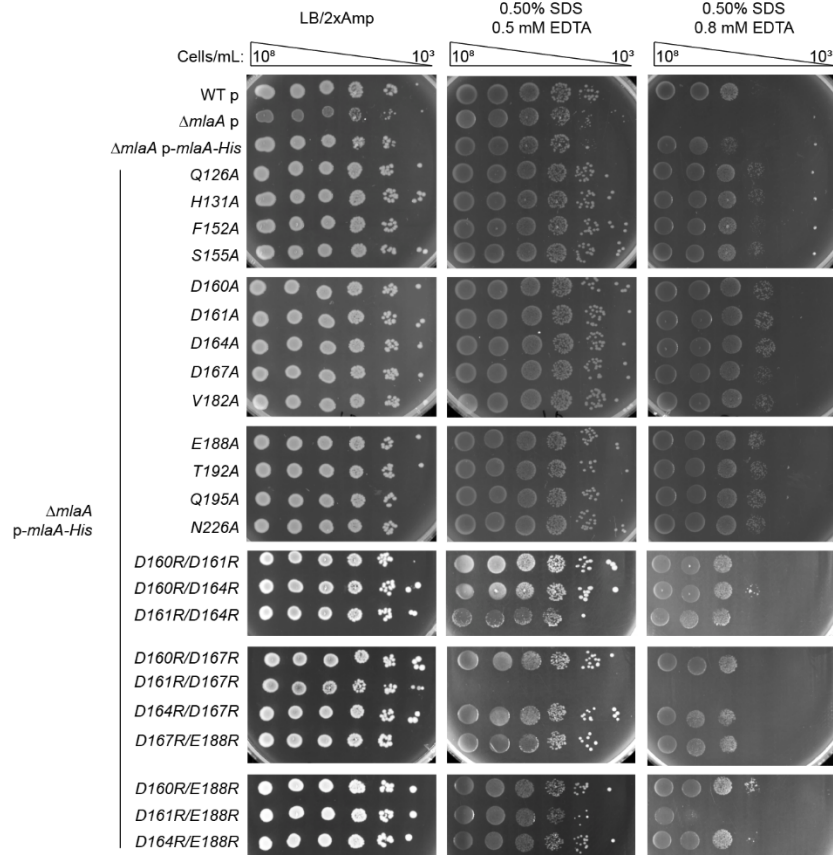

**Figure S10.** All single alanine mutations and most double arginine substitutions in the channel, except D161R/D167R, do not disrupt function in MlaA. Analysis of SDS/EDTA sensitivity of wild-type (WT) and  $\Delta mIaA$  strains producing indicated MlaA channel variants from the pET23/42 vector (p).

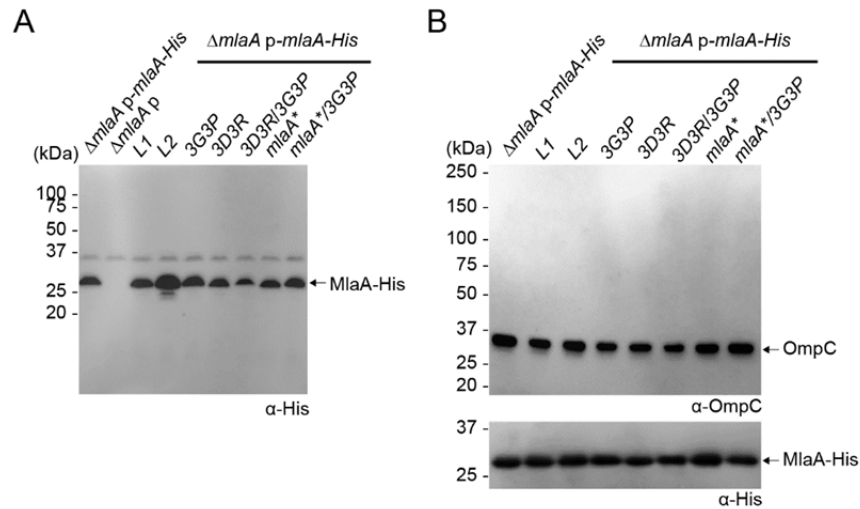

**Figure S11.** Mutations in functional regions of MlaA do not significantly affect protein levels or its interaction with OmpC. (A) Immunoblot showing the levels of indicated MlaA-His variants produced from the pET23/42 vector (p) in the  $\Delta mlaA$  strain. (B) Immunoblots showing OmpC copurified with indicated MlaA-His variants produced from the pET23/42 vector (p) in the  $\Delta mlaA$  strain.

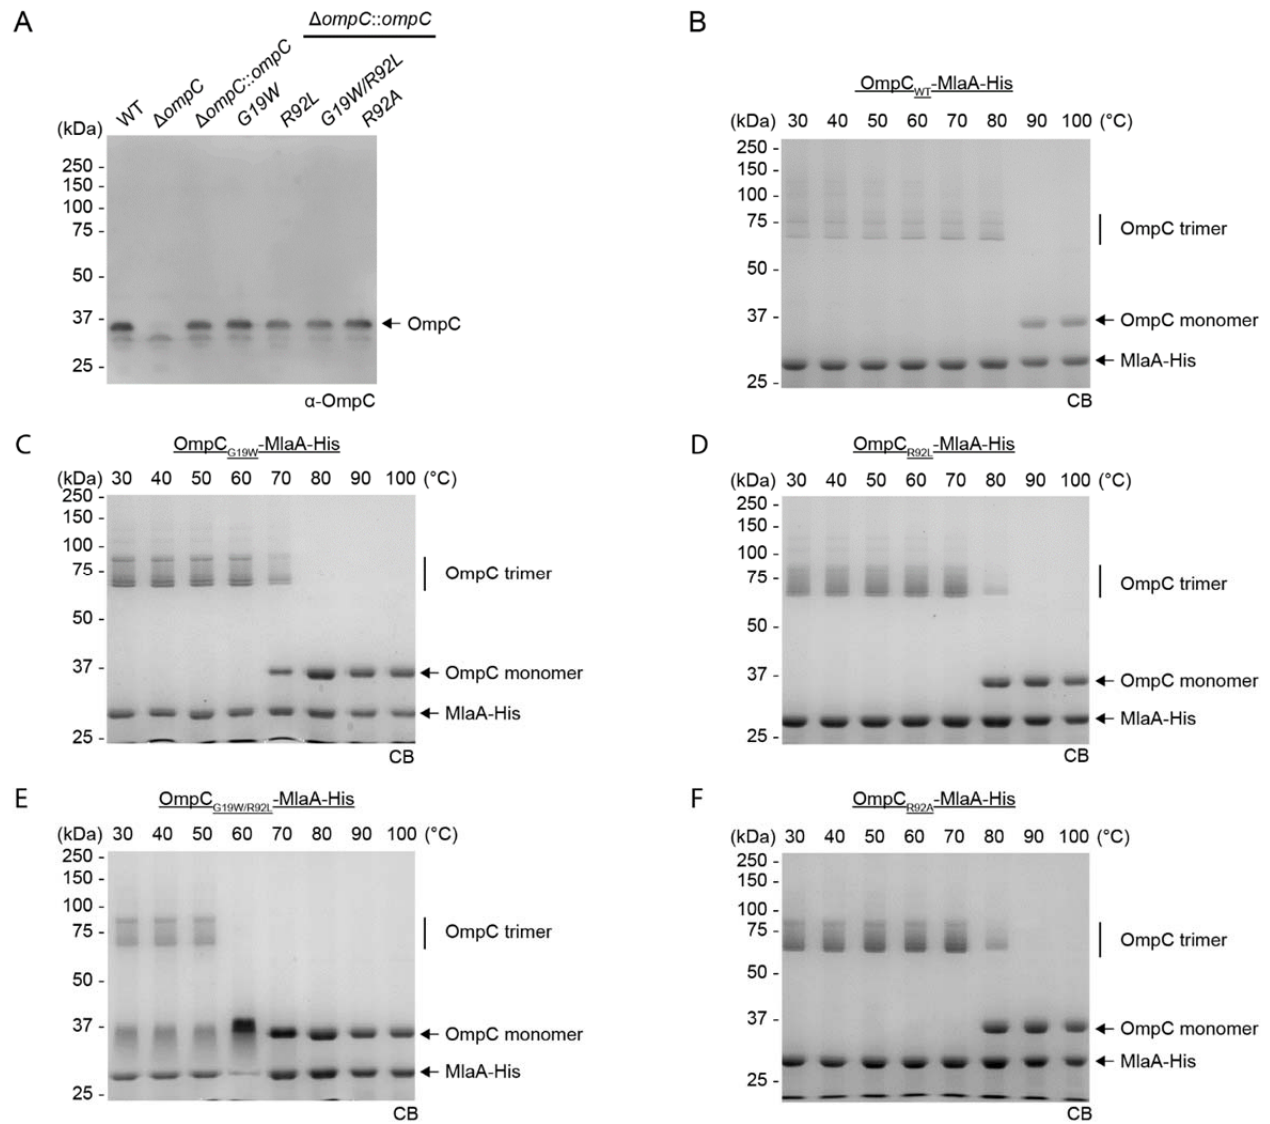

**Figure S12.** Mutations on residues G19 and R92 do not affect OmpC levels in cells, but weaken trimer stability in vitro. (A) Immunoblot showing the levels of wild-type OmpC and indicated OmpC variants produced from the chromosomal locus. (B-F) In vitro temperature titration of purified OmpC-MlaA-His and the indicated variants subjected to seminative SDS-PAGE (12% Tris.HCl gel), followed by Coomassie blue (CB) staining.



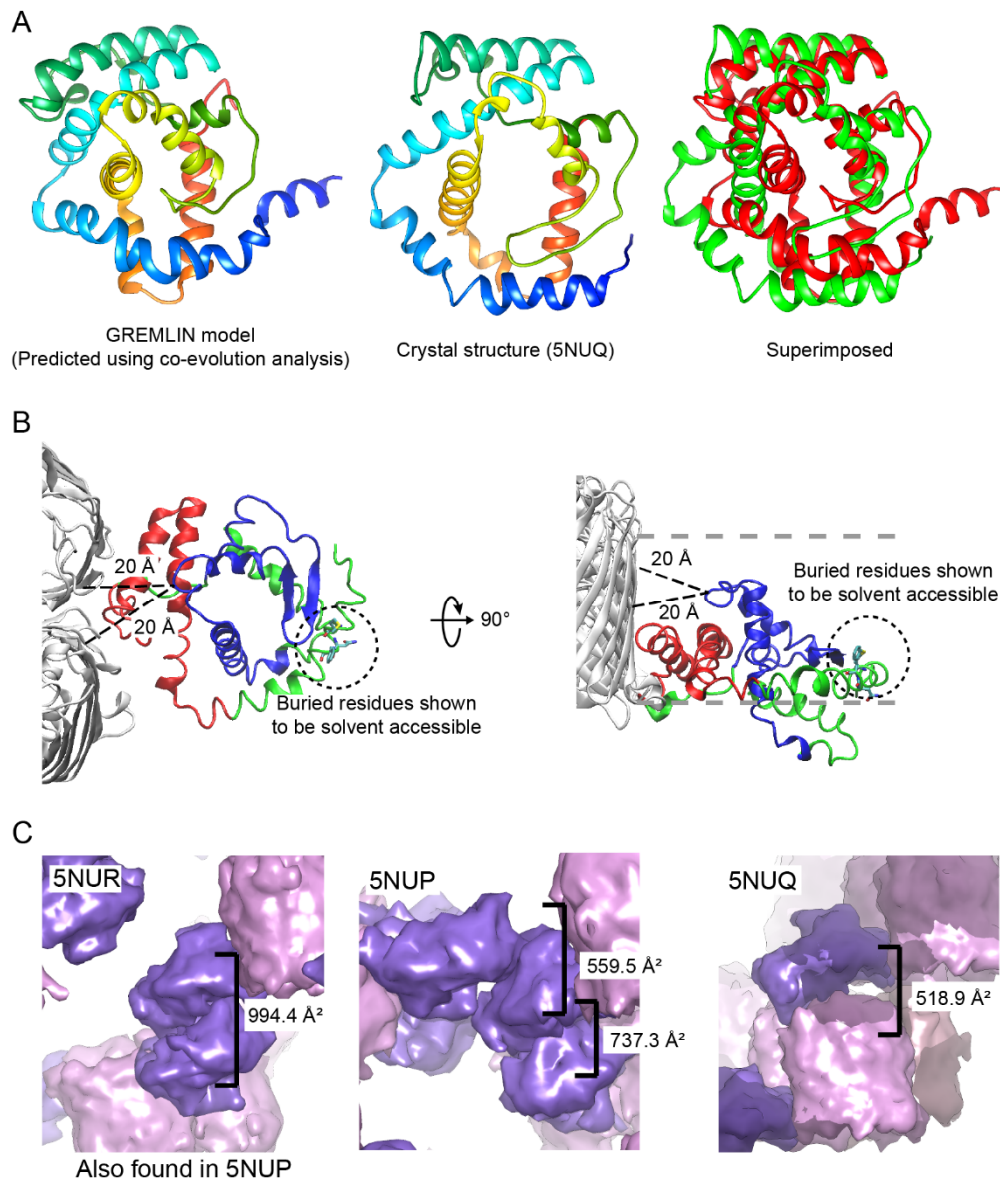

**Figure S13.** Brief analyses of the crystal structures of MlaA-porins complex. (A) Side-by-side comparison of MlaA model predicted by co-evolution analysis (*left*) with the crystal structure of MlaA derived from the OmpF-MlaA complex (PDB ID: 5NUQ; *middle*). A superimposition of these structures is shown on the right. (B) Cartoon representation of the OmpF-MlaA complex (PDB ID: 5NUQ) in top and side views, with MlaA<sub>D61-K124</sub> and MlaA<sub>F133-R205</sub> peptides highlighted in *red* and *blue*, respectively (as in Fig. 2D). The smallest distances between the MlaA<sub>F133-R205</sub> peptide (*blue*) and porin residues equivalent to L149/L340 in *E. coli* OmpC are

indicated. MlaA residues presumably buried in the lipid bilayer but solvent accessible (SCAM; Fig. S9B) are circled and depicted in sticks. (C) Surface representations of MlaA-porin crystal structures illustrating artificial crystal contacts (MlaA-MlaA or MlaA-porin) observed in different crystal forms. The buried surface areas ( $\text{\AA}^2$ ) of these contacts are indicated. Porins and MlaA are shown in *plum* and *medium purple*, respectively.

## Supplementary Tables

**Table S1. Bacterial strains used in this study**

| <b>Strains</b> | <b>Relevant genotypes and characteristics</b>                                                                     | <b>References</b> |
|----------------|-------------------------------------------------------------------------------------------------------------------|-------------------|
| MC4100         | <i>F- araD139 Δ(argF-lac) U169 rpsL150 relA1 flbB5301 ptsF25 deoC1 ptsF25 thi</i>                                 | (3)               |
| NovaBlue       | <i>endA1 hsdR17 (rK12- mK12+) supE44 thi-1 recA1 gyrA96 relA1 lac F' [proA+ B+ lacIq ZΔM15::Tn10]</i>             | Novagen           |
| BL21(λDE3)     | <i>fhuA2 [lon] ompT gal (λDE3) [dcm] ΔhsdS λDE3 = λ sBamHIo ΔEcoRI-B int::(lacI::PlacUV5::T7 gene1) i21 Δnin5</i> | Novagen           |
| TKW001         | BL21(λDE3) ΔompF::kan                                                                                             | This study        |
| CZS010         | MC4100 ΔmlaA::kan                                                                                                 | (4)               |
| CZS015         | MC4100 ΔompC::kan                                                                                                 | (4)               |
| NR1216         | MC4100 ΔdsbA::kan                                                                                                 | (5)               |

**Table S2. Plasmids used in this study**

| <b>Plasmids</b>            | <b>Relevant genotypes and characteristics</b>                                                                                                                                                           | <b>References</b> |
|----------------------------|---------------------------------------------------------------------------------------------------------------------------------------------------------------------------------------------------------|-------------------|
| pET22b(+)                  | pT7lac inducible expression vector, contains N-terminal PelB signal peptide for periplasmic localization; Amp <sup>R</sup>                                                                              | Novagen           |
| pET23/42                   | pT7 inducible expression vector, contains multiple cloning site of pET42a(+) in pET23a(+) backbone; Amp <sup>R</sup>                                                                                    | (6)               |
| pSLC-246                   | Template plasmid encoding kanamycin resistance gene for positive selection and toxin gene ( <i>tse2</i> ) under the control of rhamnose inducible promoter (P <sub>rhaB</sub> ) for negative selection. | (7)               |
| pSup-BpaRS-6TRN            | Encodes an orthogonal tRNA and aminoacyl-tRNA synthetase permitting ribosomal incorporation of <i>pBpa</i> at TAG stop codons                                                                           | (8)               |
| pKM208                     | A variation of pKM201 expresses the <i>lacI</i> repressor gene that keep expression of <i>red</i> and <i>gam</i> under tight control prior to IPTG induction                                            | (9)               |
| pACYC184                   | Low copy cloning vector; Cam <sup>R</sup>                                                                                                                                                               | (10)              |
| pCDFDuet-1                 | pT7 inducible expression vector; Spec <sup>R</sup>                                                                                                                                                      | Novagen           |
| pDSW206                    | Promoter down mutations in -35 and -10 of pTrc99a; Amp <sup>R</sup>                                                                                                                                     | (11)              |
| pET23/42 <i>mIaA-His</i>   | Encodes full length MlaA with C-terminal His8 tag; Amp <sup>R</sup> ( <i>p-mIaA-His</i> )                                                                                                               | (4)               |
| pCDF <i>mIaA-His</i>       | Encodes full length MlaA with C-terminal His8 tag; Spec <sup>R</sup>                                                                                                                                    | This study        |
| pCDF- <i>dmlaA-His</i>     | Encodes delipidated version of MlaA (a.a. 19-250) with N-terminal PelB signal peptide (for periplasmic localization) and C-terminal His8 tag; Spec <sup>R</sup>                                         | This study        |
| pET22b(+) <i>dmlaA-His</i> | Encodes delipidated version of MlaA (a.a. 19-250) with N-terminal PelB signal peptide and C-terminal His6 tag; Amp <sup>R</sup>                                                                         | (4)               |
| pACYC184 <i>ompC</i>       | Encodes full length OmpC under its native promoter; Cam <sup>R</sup>                                                                                                                                    | (4)               |
| pDSW206 <i>ompC</i>        | Encodes full length OmpC inducible by <i>lacI</i> promoter; Amp <sup>R</sup>                                                                                                                            | This study        |

**Table S3. Primers used in this study.**

| <b>Primers</b> | <b>Sequence (5' to 3')*</b>                     |
|----------------|-------------------------------------------------|
| ompC_A129B FP  | GGTAACGGCTTCTAGACCTACCGTAACTGAC                 |
| ompC_A129B RP  | GTTACGGTAGGTCTAGAAGCCGTTACCACGCTG               |
| ompC_A302B FP  | GTTGATGTTGGTTAGACCTACTACTTCAACAAAACATGTCC       |
| ompC_A302B RP  | GAAGTAGTAGGTCTAACCAACATCAACATATTTTCAGGATATC     |
| ompC_D7B FP    | GAAGTTTACAACAAATAGGGCAACAAATTAGATCTGTACGG       |
| ompC_D7B RP    | GATCTAATTTGTTGCCCTATTTGTTGTAACTTCAGCAGCG        |
| ompC_F267B FP  | GCTCAGTACCAGTAGGACTTCGGTCTGCGTCCG               |
| ompC_F267B RP  | CAGACCGAAGTCCTACTGGTACTGAGCAACAGC               |
| ompC_F40B FP   | CCTACATGCGTCTTGGCTAGAAAGGTGAAACTCAGG            |
| ompC_F40B RP   | GTTTCACCTTTCTAGCCAAGACGCATGTAGGTCTGG            |
| ompC_F82B FP   | GGCATTTCGAGGTCTGAAATAGCAGGATGTGGGTTC            |
| ompC_F82B RP   | GTCGAAAGAACCCACATCCTGCTATTTTCAGACCTGC           |
| ompC_F88B FP   | GATGTGGGTTCTTAGGACTACGGTCGTAACCTACGG            |
| ompC_F88B RP   | ACGACCGTAGTCCTAAGAACCCACATCCTG G                |
| ompC_G138B FP  | CACTGACTTCTTCTAGCTGGTTGACGGCCTGAACTTTGC         |
| ompC_G138B RP  | GGCCGTCAACCAGCTAGAAGAAGTCAGTGTTACGG             |
| ompC_G151B FP  | GTTCAGTACCAGTAGAAAAACGGCAACCCATCTGGTG           |
| ompC_G151B RP  | GTTGCCGTTTTTCTACTGGTACTGAACAGCAAAGTTC           |
| ompC_G86B FP   | TTC CAG GAT GTGTAGTCT TTC GAC TAC GGT CGT AAC   |
| ompC_G86B RP   | GTAGTCGAAAGACTACACATCCTGGAATTTTCAGACCTGC        |
| ompC_G8B FP    | GAAGTTTACAACAAAGACTAGAACAAATTAGATCTGTACGG       |
| ompC_G8B RP    | GATCTAATTTGTTCTAGTCTTTGTTGTAACTTAGCAGCG         |
| ompC_K81B FP   | CATTTCGAGGTCTGTAGTTCAGGATGTGGGTTC               |
| ompC_K81B RP   | CACATCCTGGAACTACAGACCTGCGAATGCCACAC             |
| ompC_L143B FP  | CTGGTTGACGGCTAGAACTTTGCTGTTTCAGTACC             |
| ompC_L143B RP  | CAGCAAAGTTCTAGCCGTCAACCAGACCGAAG                |
| ompC_L271B FP  | GTTTCGACTTCGGTTAGCGTCCGTCCCTGGCTTAC             |
| ompC_L271B RP  | CAGGGACGGACGCTAACCGAAGTCGAACTGGTAC              |
| ompC_L275B FP  | GCGTCCGTCCTAGGCTTACCTGCAGTCTAAAG                |
| ompC_L275B RP  | GCAGGTAAGCCTAGGACGGACGCAGACCGAAG                |
| ompC_L340B FP  | AACATCGTAGCTTAGGGTCTGGTTTACCAGTTC               |
| ompC_L340B RP  | GTA AAC CAG ACCCTAAGC TAC GAT GTT ATC AGT GTT G |
| ompC_L50B FP   | G GTT ACT GAC CAGTAGACC GGT TAC GGC CAG TG      |
| ompC_L50B RP   | GCC GTA ACC GGTCTACTG GTC AGT AAC CTG AGT TTC   |
| ompC_L80B FP   | GCA TTC GCA GGTTAGAAA TTC CAG GAT GTG GG        |
| ompC_L80B RP   | CATCCTGGAATTTCTAACCTGCGAATGCCACAC               |
| ompC_M310B FP  | CTTCAACAAAACCTAGTCCACCTACGTTGACTACAAAATC        |
| ompC_M310B RP  | CAACGTAGGTGGACTAGTTTTTTGTTGAAGTAGTAGG           |
| ompC_N133B FP  | GCGACCTACCGTTAGACTGACTTCTTCGGTCTG               |
| ompC_N133B RP  | GAAGAAGTCAGTCTAACGGTAGGTCGCGAAGCC               |
| ompC_P273B FP  | CTTCGGTCTGCGTTAGTCCCTGGCTTACCTGCAG              |
| ompC_P273B RP  | GTAAGCCAGGGACTAACGCAGACCGAAGTCGAACTGG           |

|               |                                                    |
|---------------|----------------------------------------------------|
| ompC_Q266B FP | GTTGCTCAGTACTAGTTCGACTTCGGTCTGCGTC                 |
| ompC_Q266B RP | CCGAAGTCGAACTAGTACTGAGCAACAGCTTCG                  |
| ompC_Q83B FP  | GGTCTGAAATTCTAGGATGTGGGTTCTTTCGAC                  |
| ompC_Q83B RP  | AGAACCCACATCCTAGAATTCAGACCTGCG                     |
| ompC_Y131B FP | CGGCTTCGCGACCTAGCGTAACACTGACTTCTTC                 |
| ompC_Y131B RP | GTCAGTGTTACGCTAGGTCGCGAAGCCGTTACC                  |
| ompC_Y149B FP | CTTTGCTGTTCAGTAGCAGGGTAAAAACGGCAAC                 |
| ompC_Y149B RP | GTTTTTACCCTGCTACTGAACAGCAAAGTTCAGGCCG              |
| ompC_Y304B FP | GTTGGTGCTACCTAGTACTTCAACAAAAACATGTCC               |
| ompC_Y304B RP | TTTGTTGAAGTACTAGGTAGCACCAACATCAACATATTTTCAG        |
| ompC_Y53B FP  | CCAGCTGACCGGTTAGGGCCAGTGGGAATATC                   |
| ompC_Y53B RP  | TCCCCTGGCCCTAACCGGTCAGCTGGTCAGTAAC                 |
| ompC_Y90B FP  | GGTTCTTTCGACTAGGGTCGTAACACTACGGCG                  |
| ompC_Y90B RP  | GTAGTTACGACCCTAGTTCGAAAGAACCCACATCCTG              |
| <br>          |                                                    |
| ompC_NS_N5    | ATGAAAGTTAAAGTACTGTCCCTCCTGGTCCCAGCTCTGCGTG<br>TAG |
|               | <u>GCTGGAGCTGCTTC</u>                              |
| ompC_NS_C3    | TTAGAACTGGTAAACCAGACCCAGAGCTACGATGTTATCACA<br>TATG |
|               | <u>AA TATCCTCCTTAG</u>                             |
| ompC_NS_N5_C  | ATGAAAGTTAAAGTACTGTCCCTCCTG                        |
| ompC_NS_C3_C  | TTAGAACTGGTAAACCAGACCCAG                           |
| <br>          |                                                    |
| mlaA_D160A FP | TTCACGCTGCGTGCGGACGGTGGTGATATGGCG                  |
| mlaA_D160A RP | ATCACCACCGTCCGCACGCAGCGTGAAGCTACC                  |
| mlaA_D161A FP | CGCTGCGTGATGCGGGTGGTGATATGGCGGATG                  |
| mlaA_D161A RP | CATATCACCACCCGCATCACGCAGCGTGAAGC                   |
| mlaA_D164A FP | GATGACGGTGGTGCGATGGCGGATGGTTTTTAC                  |
| mlaA_D164A RP | ACCATCCGCCATCGCACCACCGTCATCACGCAG                  |
| mlaA_D167A FP | GACGGTGGTGATATGGCGGCGGGTTTTTACCCG                  |
| mlaA_D167A RP | AAGAACCGGGTAAAAACCCGCCCATATCACC                    |
| mlaA_E188A FP | AAATGGACGCTTGCGGGGATCGAAACCCGCGC                   |
| mlaA_E188A RP | GTTTCGATCCCCGCAAGCGTCCATTTACCCAC                   |
| mlaA_F152A FP | G TTCAGTTACCGGCGTACGGTAGCTTACGCTG                  |
| mlaA_F152A RP | GAAGCTACCGTACGCCGGTAACTGAACGTAAGG                  |
| mlaA_H131A FP | GGACTGAACCTGCGCGCTTCGGTAGTACGCTTG                  |
| mlaA_H131A RP | CTACCGAAGCGCGCAGGTTTACGTCGGTTGCAG                  |
| mlaA_N226A FP | GATTCATCGCTGCGGGCGGCGAACTCAAACCG                   |
| mlaA_N226A RP | GAGTTCGCCGCCCGCAGCGATGAAATCATGACG                  |
| mlaA_Q126A FP | GAACCCGAAACTGGCCGCGGACTGAACCTCACCGC                |
| mlaA_Q126A RP | GGTTCAGTCCGCGCCAGTTTTCGGGTTTCGCCATC                |
| mlaA_Q195A FP | GAAACCCGCGCTGCGCTGCTGGATTCCGATGG                   |
| mlaA_Q195A RP | GAATCCAGCAGCGCAGCGCGGGTTTCGATCCC                   |
| mlaA_S155A FP | CCGTTCTACGGTGCGTTCACGCTGCGTGATGAC                  |

|                                |                                                 |
|--------------------------------|-------------------------------------------------|
| mlaA_S155A RP                  | CGCAGCGTGAACGCACCGTAGAACGGTAACTG                |
| mlaA_T192A FP                  | GAAGGGATCGAAGCGCGCGCTCAGCTGCTG                  |
| mlaA_T192A RP                  | CTGAGCGCGCGCTTCGATCCCTTCAAGCGTC                 |
| mlaA_V182A FP                  | GCCGATGTCTGCGGGTAAATGGACGCTTGAAG                |
| mlaA_V182A RP                  | CGTCCATTTACCCGCAGACATCGGCCAGGTACG               |
| mlaA_D160R FP                  | TTCACGCTGCGTCGCGACGGTGGTGATATGGCG               |
| mlaA_D160R RP                  | ATCACCACCGTTCGCGACGCAGCGTGAAGCTACC              |
| mlaA_D161R FP                  | CGCTGCGTGATCGCGGTGGTGATATGGCGGATG               |
| mlaA_D161R RP                  | CATATCACCACCGCGATCACGCAGCGTGAAGC                |
| mlaA_D164R FP                  | GATGACGGTGGTGCATGGCGGATGGTTTTTAC                |
| mlaA_D164R RP                  | ACCATCCGCCATGCGACCACCGTCATCACGCAG               |
| mlaA_D167R FP                  | GACGGTGGTGATATGGCGCGCGGTTTTTACCCG               |
| mlaA_D167R RP                  | AAGAACCGGGTAAAAACCGCGCGCCATATCACC               |
| mlaA_D61R FP                   | GTCGCCTGGCGTCGCTATGTTCCGCAACCGGCG               |
| mlaA_D61R RP                   | TTGCGGAACATAGCGACGCCAGGCGACAGCGAC               |
| mlaA_E188R FP                  | AAATGGACGCTTCGCGGGGATCGAAACCCGCGC               |
| mlaA_E188R RP                  | GTTTCGATCCC <u>CGA</u> AAGCGTCCATTTACCCAC       |
| 3D3R FP SDM                    | CTTCACGCTGCGTCG <u>CCGCG</u> GGTGGT <u>TCGC</u> |
| 3D3R RP SDM                    | ATGGCGGATGGTTTTTACC                             |
| F <sup>152</sup> YGSF_to_5A FP | AACCATCCGCCATGCGACCACCGCGGCGACGCAGCGTGAAGC      |
| F <sup>152</sup> YGSF_to_5A RP | TACCG                                           |
| GVGYG_3G3A_FP                  | GTTCAGTTACCGCGGCGGCGGCGGCGACGCTGCGTGATGAC       |
| GVGYG_3G3A_FP                  | GGTGG                                           |
| GVGYG_3G3A_FP                  | CATCACGCAGCGTCGCCGCGCCGCGCCGCGGTAACCTGAACGT     |
| GVGYG_3G3A_FP                  | AAGG                                            |
| GVGYG_3G3A_FP                  | CTTGGTCATTATGCGGTGGCGTATGCGCCTTACGTTACGTTAC     |
| GVGYG_3G3A_FP                  | CG                                              |
| GVGYG_3G3A_FP                  | CTGAACGTAAGGCGCATAACGCCACCGCATAATGACCAAGCGT     |
| GVGYG_3G3A_FP                  | AC                                              |
| GVGYG_3G3P_FP                  | CTTGGTCATTATCCTGTGCCTTATCCTCCTTACGTTACGTTACC    |
| GVGYG_3G3P_FP                  | G                                               |
| GVGYG_3G3P_FP                  | CTGAACGTAAGGAGGATAAGGCACAGGATAATGACCAAGCG       |
| GVGYG_3G3P_FP                  | TAC                                             |
| mlaA_P151A FP                  | TACGTTACGTTAGCGTTCTACGGTAGCTTACGCTG             |
| mlaA_P151A RP                  | GCTACCGTAGAACGCTAACTGAACGTAAGGCC                |
| Y <sup>147</sup> VQL_to_4A FP  | GGTTATGGGCCTGCGGCGGCGGCGCCGTTCTACGGTAGCTTC      |
| Y <sup>147</sup> VQL_to_4A FP  | AC                                              |
| Y <sup>147</sup> VQL_to_4A RP  | CTACCGTAGAACGCGCGCCGCGCCGCGCAGGCCATAACCCACG     |
| Y <sup>147</sup> VQL_to_4A RP  | CC                                              |
| mlaA_Y40C FP                   | CAACCGCACCATGTGCAACTTCAACTTCAATG                |
| mlaA_Y40C RP                   | AGTTGAAGTTGCACATGGTGGCGTTGAACCC                 |
| mlaA_D48C FP                   | CTTCAATGTATTATGCCCGTATATTGTTTCGACC              |
| mlaA_D48C RP                   | ACAATATACGGGCATAATACATTGAAGTTGAAG               |

mlaA\_D92C FP  
mlaA\_D92C RP  
mlaA\_F114C FP  
mlaA\_F114C RP  
mlaA\_F74C FP  
mlaA\_F74C RP  
mlaA\_G227C FP  
mlaA\_G227C RP  
mlaA\_M84C FP  
mlaA\_M84C RP  
mlaA\_P209C FP  
mlaA\_P209C RP  
mlaA\_R193C FP  
mlaA\_R193C RP  
mlaA\_T157C FP  
mlaA\_T157C RP  
mlaA\_D161C FP  
mlaA\_D161C RP  
mlaA\_D167C FP  
mlaA\_D167C RP  
mlaA\_D61C FP  
mlaA\_D61C RP  
mlaA\_E188C FP  
mlaA\_E188C RP  
mlaA\_F42C FP  
mlaA\_F42C RP  
mlaA\_K184C FP  
mlaA\_K184C RP  
mlaA\_L150C FP  
mlaA\_L150C RP  
mlaA\_L78C FP  
mlaA\_L78C RP  
mlaA\_M39C FP  
mlaA\_M39C RP  
mlaA\_N226C FP  
mlaA\_N226C RP  
mlaA\_N43C FP  
mlaA\_N43C RP  
mlaA\_N86C FP  
mlaA\_N86C RP  
mlaA\_Q126C FP  
mlaA\_Q126C RP  
mlaA\_Q149C FP  
mlaA\_Q149C RP  
mlaA\_Q195C FP

TAACTACTTCTTGCAGGGCTGCCCTTATCAGGGG  
GACCATCCCCTGATAAGGGCAGCCCTGCAAGAAG  
GGGATGGGCGGTTGCATTGATGTTGCAGGGATG  
GCAACATCAATGCAACCGCCCATCCCCAAAATGG  
GTTTGAGCAACTGCACTGGCAACCTTGAAGAACC  
CAAGGTTGCCAGTGCAGTTGCTCAAACCGTTACG  
TTCATCGCTAATTGCGGCGAACTCAAACCGCAG  
GTTTGAGTTCGCCGCAATTAGCGATGAAATCATG  
GAACCTGCGGTGTGCGTTAACTACTTCTTGCAGG  
GAAGTAGTTAACGCACACCGCAGGTTCTTCAAGG  
CAGTCGTCCGATTGCTATATTATGGTGCGCGAAG  
GCACCATAATATAGCAATCGGACGACTGACGCAG  
GGGATCGAAACCTGCGCTCAGCTGCTGGATTCC  
CAGCAGCTGAGCGCAGGTTTCGATCCCTTCAAGC  
CTACGGTAGCTTCTGCCTGCGTGATGACGGTGG  
TCATCACGCAGGCAGAAGCTACCGTAGAACGG  
CGCTGCGTGATTGCGGTGGTGATATGGCGGATG  
CATATCACCACCGCAATCACGCAGCGTGAAGC  
GACGGTGGTGATATGGCGTGCAGTTTTTACCCG  
AAGAACCGGGTAAAACCGCACGCCATATCACC  
GTCGCCTGGCGTTGCTATGTTCCGCAACCGGCG  
TTGCGGAACATAGCAACGCCAGGCGACAGCGAC  
AAATGGACGCTTTGCGGGATCGAAACCCGCGC  
GTTTCGATCCCGLAAAGCGTCCATTTACCCAC  
ACCATGTACAACCTGCAACTTCAATGTATTAGAC  
TACATTGAAGTTGCAGTTGTACATGGTGCAGGTT  
CCGATGTCTGTGGGTTGCTGGACGCTTGAAG  
GATCCCTTCAAGCGTCCAGCAACCCACAGAC  
TTACGTTCAGTGCCCGTTCTACGGTAGCTTC  
ACCGTAGAACGGGCACTGAACGTAAGGCC  
CTTTACTGGCAACTGCGAAGAACCTGCGGTGATGG  
CGCAGGTTCTTCGCAGTTGCCAGTAAAGTTGCTCAAAC  
TTCAACCGCACCTGCTACAACCTCAACTTCAATG  
AGTTGAAGTTGTAGCAGGTGCGGTTGAACCCTTC  
GATTCATCGCTTGCAGGCGGCGAACTCAAACCG  
GAGTTCGCCGCCGCAAGCGATGAAATCATGACG  
CATGTACAACCTTCTGCTTCAATGTATTAGACCCG  
TAATACATTGAAGCAGAAGTTGTACATGGTGCAGG  
GCGGTGATGGTTTGCTACTTCTTGCAGGGCGA  
CTGCAAGAAGTAGCAAACCATCACCGCAGGTTCTTC  
GAACCCGAAACTGTGCCGGACTGAACCTCACCGC  
GGTTCAGTCCGGCACAGTTTCGGGTTCCGCATC  
GGGCCTTACGTTTGCTTACCGTTCTACGGTAGC  
GTAGAACGGTAAAGCAAACGTAAGGCCCATACC  
GAAACCCGCGCTTGCTGCTGGATTCCGATGG



|               |                                          |
|---------------|------------------------------------------|
| mlaA_Q195C RP | GAATCCAGCAGGCAAGCGCGGGTTTCGATCCC         |
| mlaA_R204C FP | GATTCCGATGGTCTGCTGTGCCAGTCGTCCGATCC      |
| mlaA_R204C RP | AATATAAGGATCGGACGACTGGCACAGCAGACCATC     |
| mlaA_R220C FP | GCGAAGCGTACTTCCAGTGCCATGATTTTCATC        |
| mlaA_R220C RP | CATTAGCGATGAAATCATGGCACTGGAAGTAC         |
| mlaA_T107C FP | CGCTTTTTCTGAACTGCATTTTGGGGATGGGCGG       |
| mlaA_T107C RP | CATCCCCAAAATGCAGTTCAGGAAAAAGCGGGTAAAGTGG |
| mlaA_T136C FP | CGCTTCGGTAGTTGCCTTGGTCATTATGGCGTG        |
| mlaA_T136C RP | ATAATGACCAAGGCAACTACCGAAGCGGTGAGG        |
| mlaA_T192C FP | GAAGGGATCGAATGCCGCGCTCAGCTGCTG           |
| mlaA_T192C RP | CTGAGCGCGGCATTTCGATCCCTTCAAGCGTC         |
| mlaA_Y144C FP | ATGGCGTGGGTTGCGGGCCTTACGTTTCAGTTACC      |
| mlaA_Y144C RP | GAACGTAAGGCCCGCAACCCACGCCATAATGAC        |
| mlaA_D161C FP | CGCTGCGTGATTGCGGTGGTGATATGGCGGATG        |

|                                           |                                                         |
|-------------------------------------------|---------------------------------------------------------|
| pCDFDuet-<br>1_pelB_mlaA_Chis<br>NdeI_Fwd | CGCT <u>CAT ATG</u> AAA TAC CTG CTG CCG ACC GCT GCT GC  |
| pCDFDuet-<br>1_FL_mlaA_Chis<br>NdeI_Fwd   | CGCT <u>CAT ATG</u> AAG CTT CGC CTG TCG                 |
| pCDFDuet-<br>1_mlaA_AvrII Rev             | AGAT <u>CCT AGG</u> TCA GTG GTG GTG GTG GTG CTC GAG     |
| pDSW206_ompC_Nco<br>I Fwd                 | CGAT <u>CC ATG GCA</u> AAA GTT AAA GTA CTG TCC CTC C    |
| pDSW206_ompC_Hin<br>dIII Rev              | CGCT <u>AAG CTT</u> TTA GAA CTG GTA AAC CAG ACC CAG AGC |

---

\* sites for mutagenesis or restriction enzyme cleavage, where relevant, are underlined.
